# Supplementary material
Source: publisher figshare collection journal article supplement (https://karger.figshare.com/ndownloader/files/40880627)

**SUPPLEMENTAL MATERIAL**

**Figure S1**: LabVIEW code to control the pump speed and to calculate the flow rate (above) and with the pump shaft encoder measuring the pump speed (down)

**
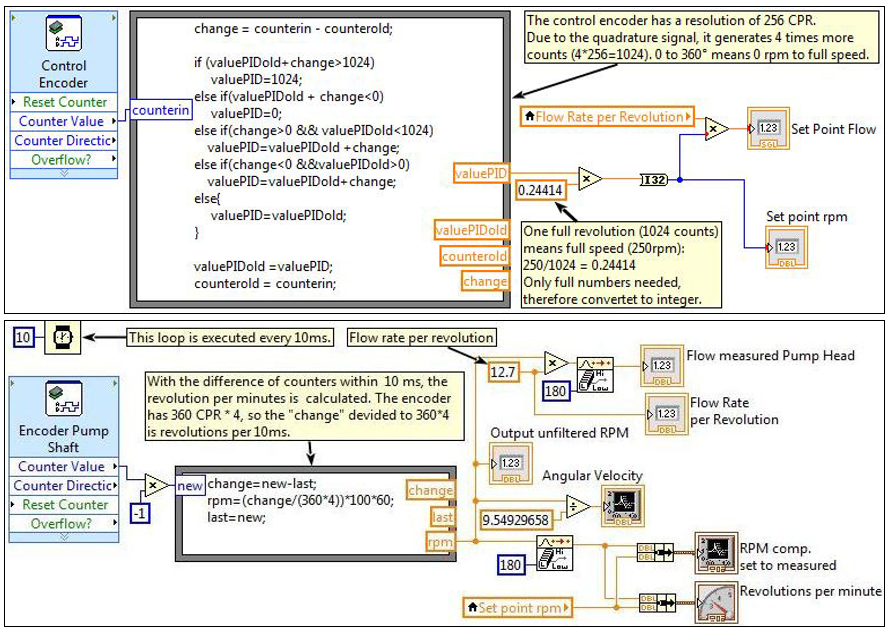
**

**Figures S2** Block diagram of the control loop

**
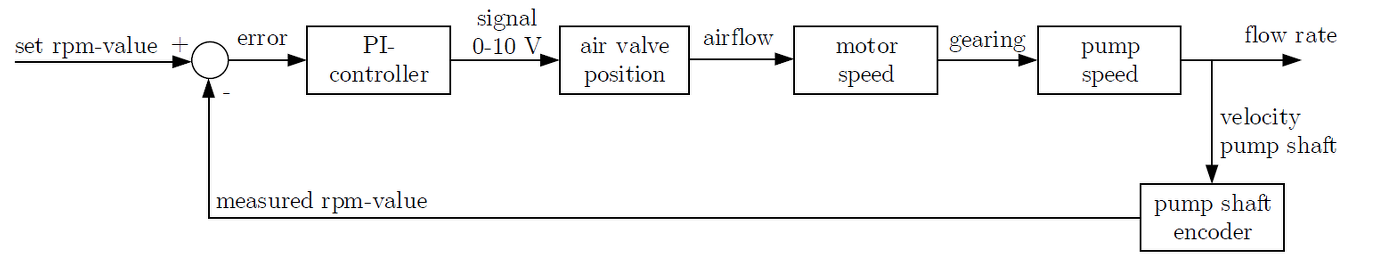
**

**Figure S3** Comparison of flow distribution between the prototype and Stöckert S3 at different flow rates. (The boxplot covers all values from the minimum to the maximum.)


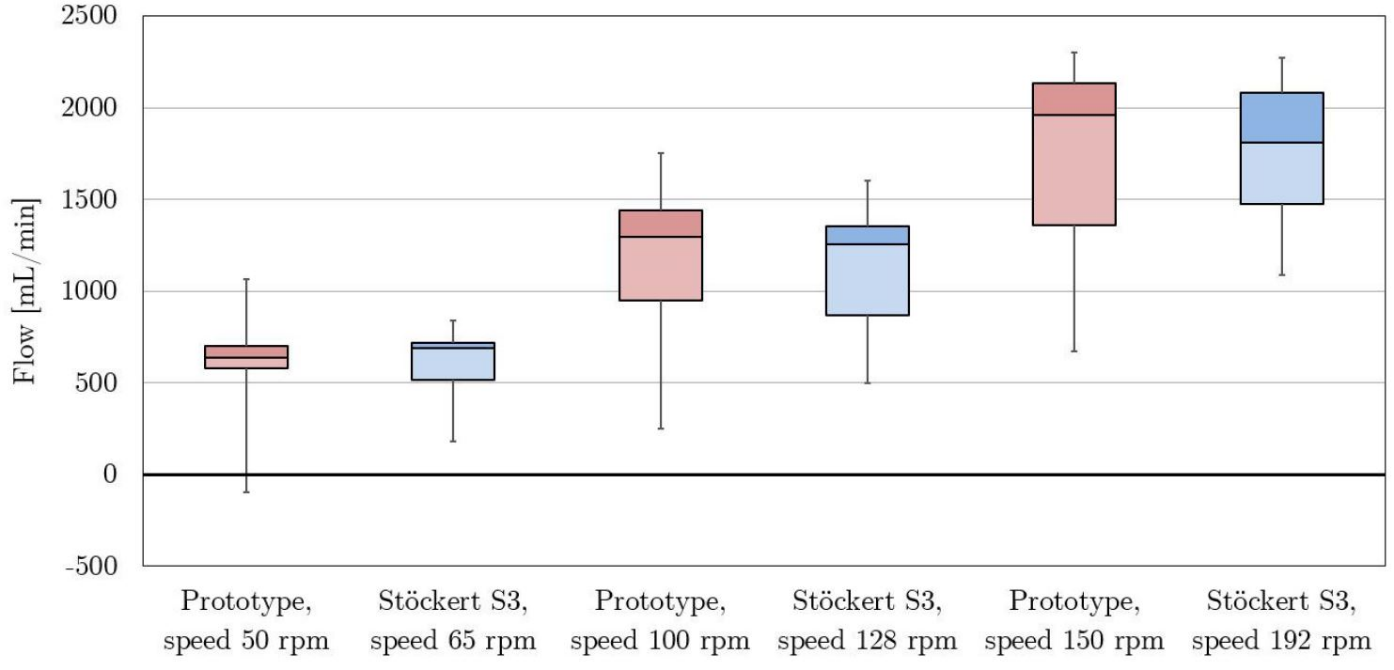

Supplement: Supplementary file 1 [file 40880627]
